# Supplementary material for: A novel solid-state electrolyte based on a crown ether lithium salt complex
Source: Royal Society of Chemistry journal article supplement (doi:10.1039/c5ta04933d), 2015-01-01
Supplement: c5ta04933d1.pdf [file c5ta04933d1.pdf]

***Electronic Supplementary Information (ESI) for***  
**A novel solid-state electrolyte based on crown ether  
lithium salt complex**

**Minda Gao, Yun Wang, Qinghua Yi, Ying Su, Pengfei Sun, Xiangguo Wang, Jie Zhao\***  
**and Guifu Zou\***

*College of Physics, Optoelectronics and Energy & Collaborative Innovation Center of Suzhou  
Nano Science and Technology, Soochow University, Suzhou215006, P.R. China.*

*E-mail: [jzhao@suda.edu.cn](mailto:jzhao@suda.edu.cn); [zouguifu@suda.edu.cn](mailto:zouguifu@suda.edu.cn)*

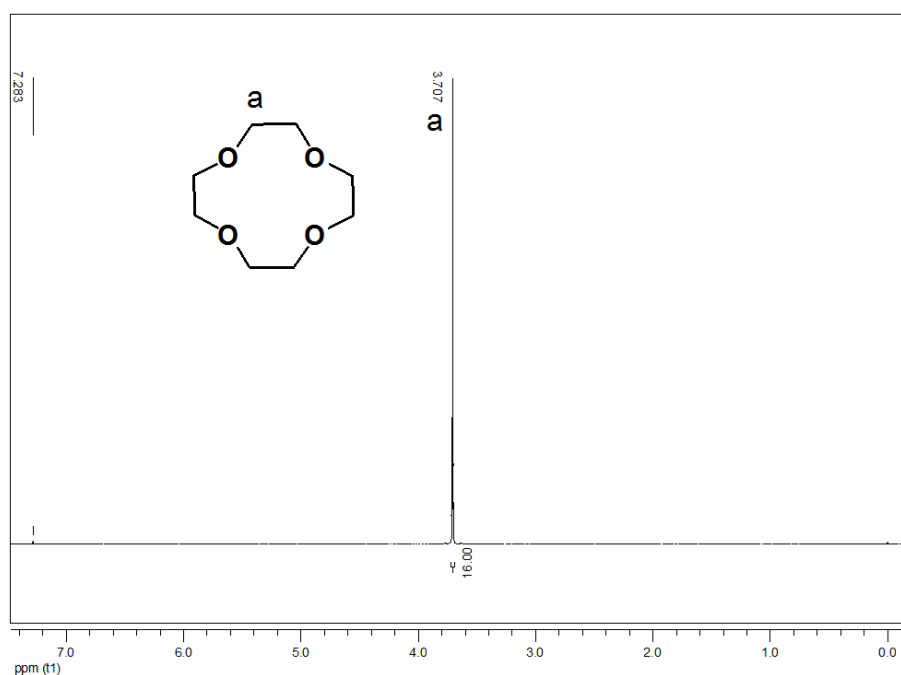

**Fig. S1** <sup>1</sup>H NMR spectrum of 12-crown-4

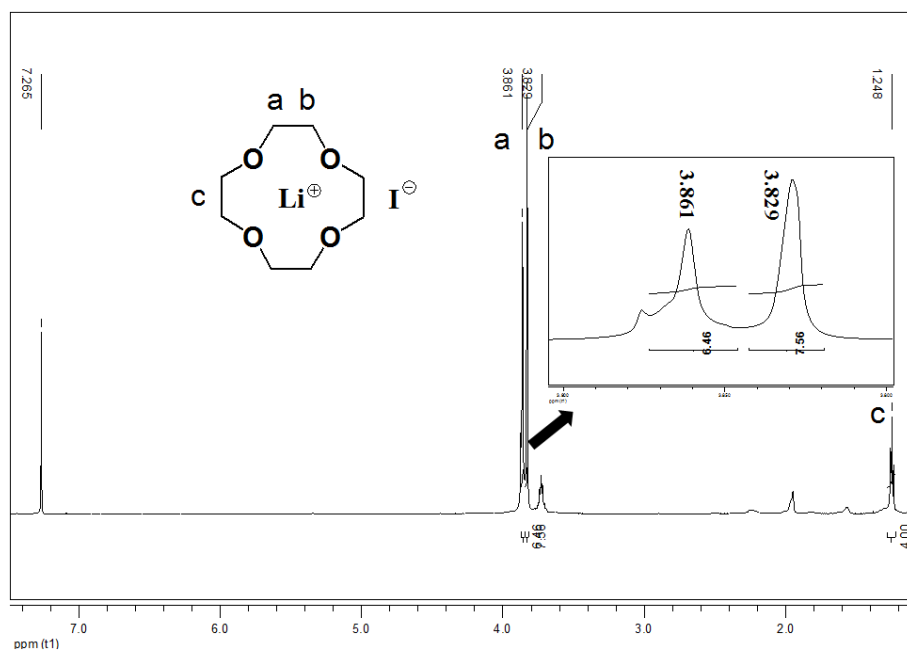

Fig. S2  $^1\text{H NMR}$  spectrum of  $[\text{Li}\epsilon 12\text{-C-4}][\text{I}]$

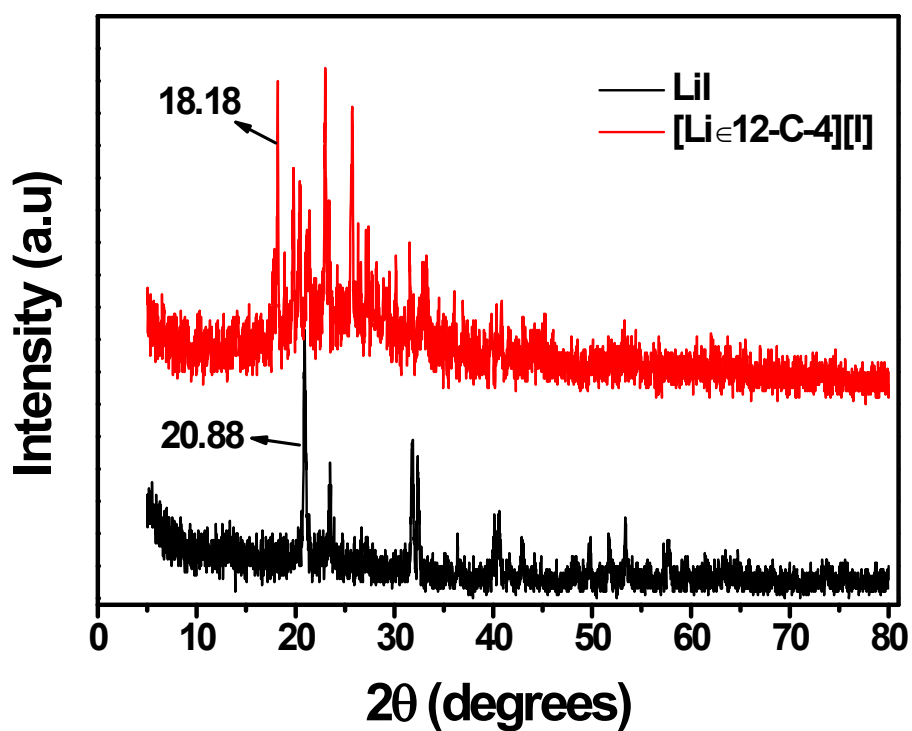

Fig. S3 XRD patterns of  $\text{LiI}$  and  $[\text{Li}\epsilon 12\text{-C-4}][\text{I}]$

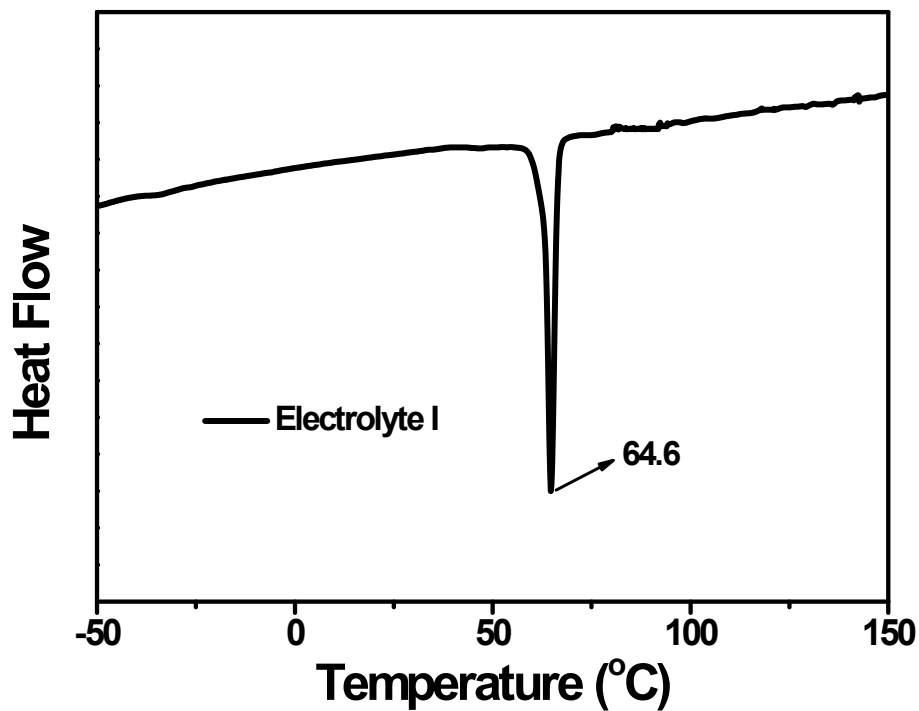

Fig. S4 Typical DSC curve of Electrolyte I with I<sub>2</sub>

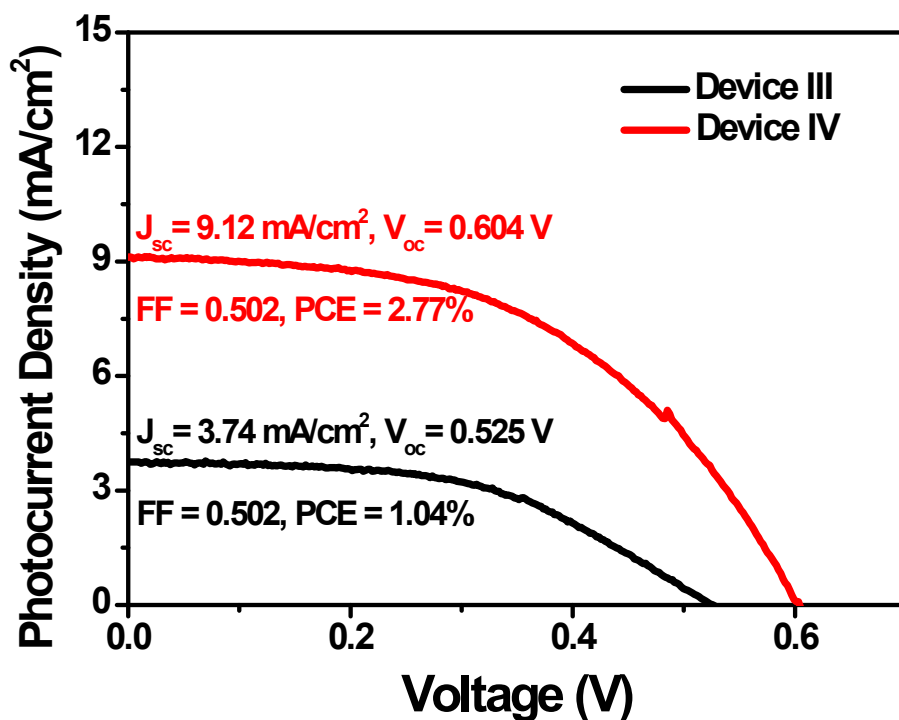

Fig. S5 J-V curves for solid-state DSSCs fabricated with Electrolytes B and G, respectively
